# Supplementary material for: Oxidant-induced intramolecular triazole formation
Source: Royal Society of Chemistry journal article supplement (doi:10.1039/c3dt51490k), 2013-01-01
Supplement: c3dt51490k.pdf [file c3dt51490k.pdf]

# Intramolecular Triazole Formation - Supporting Information

Maria L. Abraham, A. Carina Schulze, Alexander Korthaus, and Iris M. Oppel\*

*Institute of Inorganic Chemistry, RWTH Aachen, Landoltweg 1, 52074 Aachen, Germany.  
E-mail: iris.oppel@ac.rwth-aachen.de*

## 1 Moleculare Structures

Chelation of Gd(III)-ions by **2** in the presence of  $\text{NEt}_3$  in DMSO results within four months to formation of orange crystals of  $[\{\{\text{Gd}(\text{DMSO})\}_2(\text{HBr}_3\text{L}')(\text{H}_3\text{Br}_2\text{L}'')\}_2(\mu\text{-OH})_2] \cdot 18\text{DMSO}$  **6** (Fig. 1).

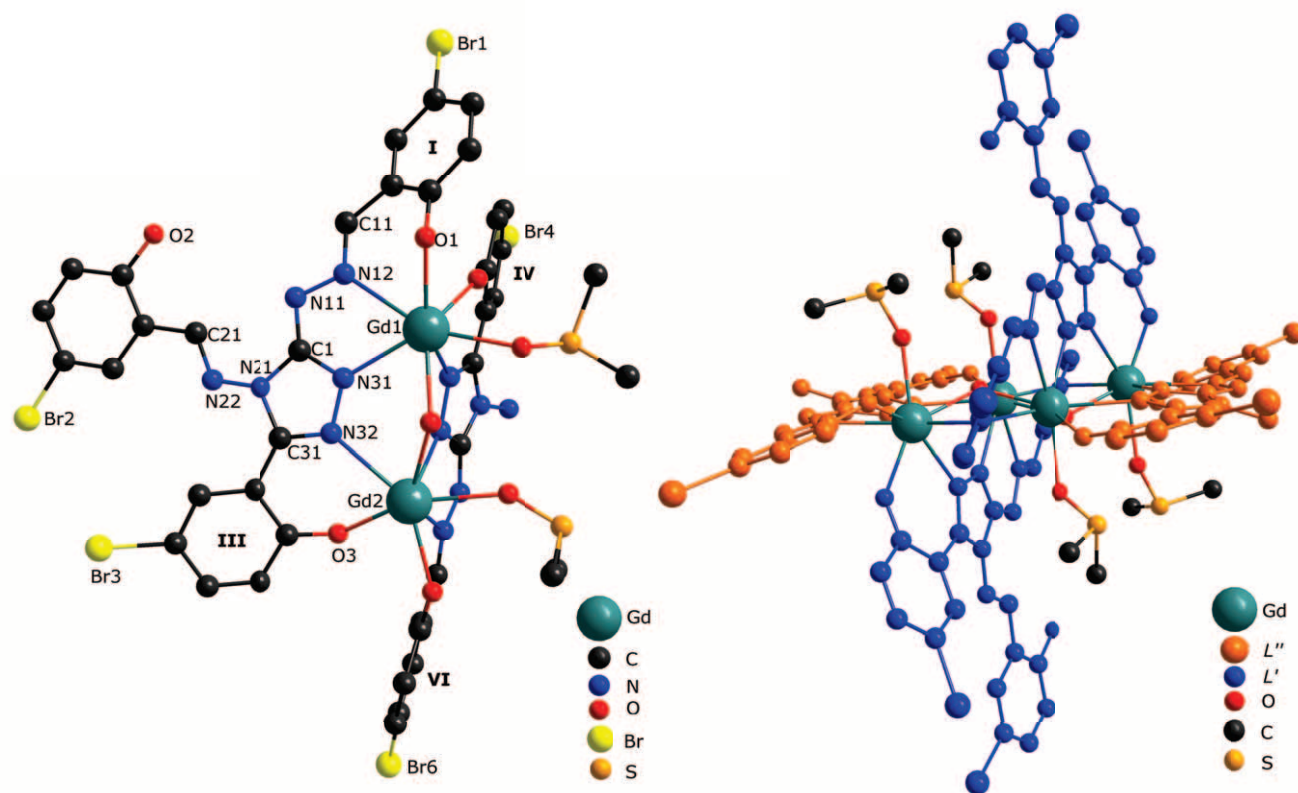

**Figure 1** Molecular structure of  $[\{\{\text{Gd}(\text{DMSO})\}_2(\text{HBr}_3\text{L}')(\text{H}_3\text{Br}_2\text{L}'')\}_2(\mu\text{-OH})_2] \cdot 18\text{DMSO}$  **6**: asymmetric unit (left) and visualisation of different triazole backbones in entire coordination (right). Hydrogen atoms and free solvent molecules have been omitted for clarity.

The reaction of **1** with  $[\text{PdCl}_2(\text{PEt}_3)_2]$  and 2 equiv. NaOH is performed under inert conditions in dry MeOH. Orange crystals of  $[\text{Pd}(\text{PEt}_3)(\text{H}_3\text{L})]$  **9** are obtained from redissolving in  $\text{Et}_2\text{O}$  and gentle solvent evaporation (Fig. 2).

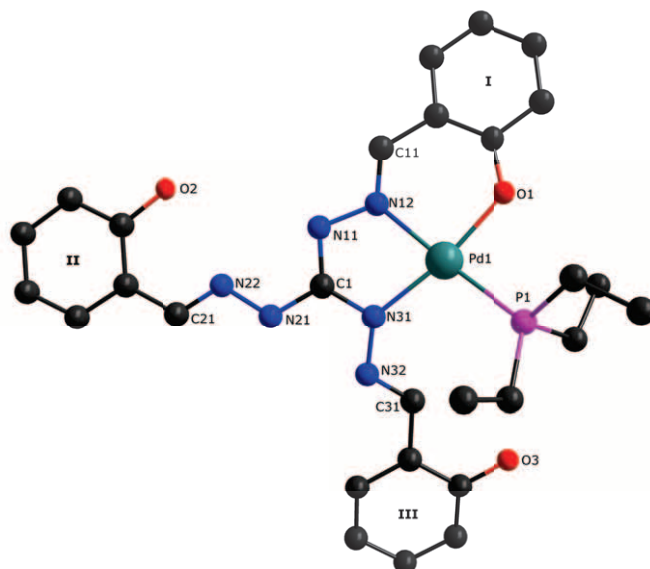

**Figure 2** Molecular structure of  $[\text{Pd}(\text{PEt}_3)(\text{H}_3\text{L})]$  **9**. Hydrogen atoms and solvent molecules have been omitted for clarity.

Orange crystals of  $[\text{Pd}(\text{PEt}_3)(\text{H}_2\text{L}')]$  **11** are obtained from gentle NMR-solvent evaporation (Fig. 3).

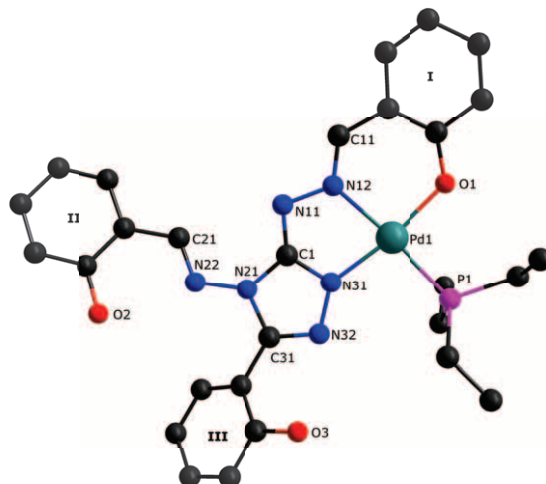

**Figure 3** Molecular structure of  $[\text{Pd}(\text{PEt}_3)(\text{H}_2\text{L}')]$  **11**. Hydrogen atoms have been omitted for clarity.

## 2 Coordination pattern of Pd(II)-ions

To compare the coordination geometry of Pd(II)-ions in **7**, **8** and **9**, the CSD database was used to look for similar coordination patterns. The bonding parameters are listed below (Tabl. 1).

| CSD code | Pd-N <sub>am</sub> | Pd-P  | Pd-N <sub>im</sub> | Pd-O  |
|----------|--------------------|-------|--------------------|-------|
| FECJUU   | 1.985              | 2.265 | 2.017              | 1.998 |
| FECKAB   | 1.995              | 2.260 | 2.001              | 2.022 |
| FECKAB   | 2.012              | 2.277 | 1.980              | 2.010 |
| FECKAB   | 1.964              | 2.262 | 2.008              | 1.997 |
| FECKAB   | 1.966              | 2.281 | 2.014              | 1.994 |
| FECKEF   | 1.965              | 2.262 | 1.979              | 2.005 |
| FECKIJ   | 1.976              | 2.269 | 2.033              | 1.984 |
| FECKIJ   | 1.967              | 2.261 | 2.024              | 1.981 |
| IZODAC   | 1.979              | 2.284 | 2.020              | 1.976 |
| PUWTAC   | 1.976              | 2.332 | 1.998              | 1.995 |
| TARMUW   | 1.965              | 2.280 | 2.014              | 2.008 |
| median   | 1.976              | 2.269 | 2.014              | 1.997 |

**Table 1** Bond distances of Pd-O-N-N coordination

## 3 Standard reduction potential

Standard reduction potentials at 298 K are taken from *Handbook of Physics and Chemistry*.  
W. M. Haynes, *Handbook of Chemistry and Physics*, **2012 – 2013**, 93<sup>rd</sup> edition.

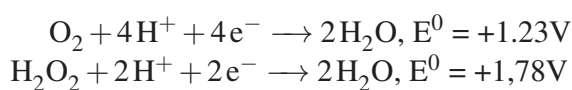

## 4 NMR data

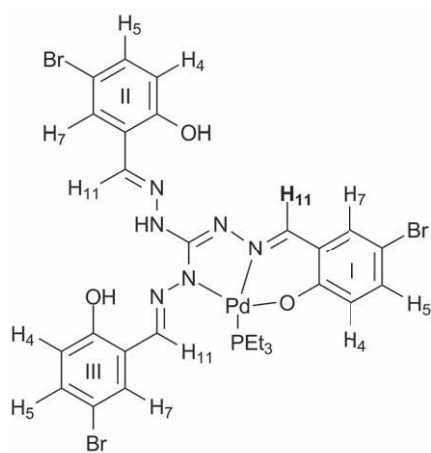

[Pd(PEt<sub>3</sub>)(H<sub>3</sub>Br<sub>3</sub>L)] **8**

| $\delta$ [ppm] | m        | H               | J [Hz]        | int      |
|----------------|----------|-----------------|---------------|----------|
| 1.20           | dt       | CH <sub>3</sub> | 7.63<br>16.95 | 9        |
| 1.79           | dq       | CH <sub>2</sub> | 7.66<br>10.02 | 6        |
| 6.89           | d        | 7               | 8.6           | 1        |
| 6.91           | d        | 7               | 8.8           | 1        |
| 6.92           | d        | 7               | 8.7           | 1        |
| 7.27           | dd       | 5               | 9.0 / 2.6     | 1        |
| 7.33           | m        | 5, 4, 4         | -             | 3        |
| 7.39           | dd       | 5               | 8.7 / 2.4     | 1        |
| 7.45           | d        | 4               | 2.6           | 1        |
| 7.82           | s        | 11              | -             | 1        |
| 7.98           | s        | 11              | -             | 1        |
| <b>8.12</b>    | <b>d</b> | <b>11</b>       | <b>14.1</b>   | <b>1</b> |
| 8.27           | s        | OH              | -             | 1        |
| 10.42          | s        | OH              | -             | 1        |
| 11.33          | s        | NH              | -             | 1        |

Table 2 <sup>1</sup>H-NMR assignment of **8**

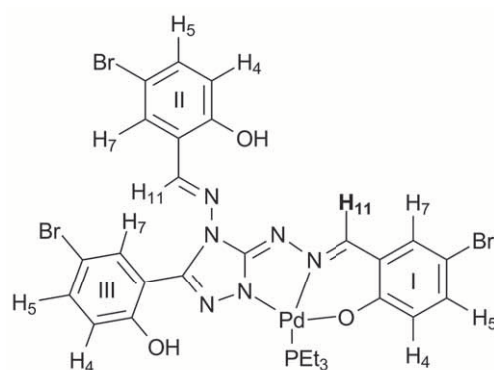

[Pd(PEt<sub>3</sub>)(H<sub>2</sub>Br<sub>3</sub>L')] **10**

| $\delta$ [ppm] | m        | H               | J [Hz]        | int      |
|----------------|----------|-----------------|---------------|----------|
| 1.30           | dt       | CH <sub>2</sub> | 7.63<br>17.20 | 9        |
| 2.08           | dq       | CH <sub>3</sub> | 7.62<br>10.96 | 6        |
| 6.94           | d        | 7               | 8.8           | 1        |
| 6.97           | d        | 7               | 8.8           | 1        |
| 7.00           | d        | 7               | 9.0           | 1        |
| 7.30           | dd       | 5               | 9.0 / 2.6     | 1        |
| 7.45           | dd       | 5               | 8.8 / 2.4     | 1        |
| 7.49           | dd       | 5               | 8.8 / 2.5     | 1        |
| 7.52           | d        | 4               | 2.6           | 1        |
| 7.69           | d        | 4               | 2.4           | 1        |
| 8.02           | d        | 4               | 2.4           | 1        |
| <b>8.39</b>    | <b>d</b> | <b>11</b>       | <b>13.7</b>   | <b>1</b> |
| 9.81           | s        | 11              | -             | 1        |
| 10.02          | s        | OH              | -             | 1        |
| 10.04          | s        | OH              | -             | 1        |

Table 3 <sup>1</sup>H-NMR assignment of **10**

## 5 ESI-MS

ESI-mass spectra for **5**, **6** could not be obtained as the compounds seemed to decompose after acidification of the samples. ESI-mass spectra of **8** and **9** could not be recorded as they underwent the oxidation process to the form triazoles **10** and **11** in solution too fast.

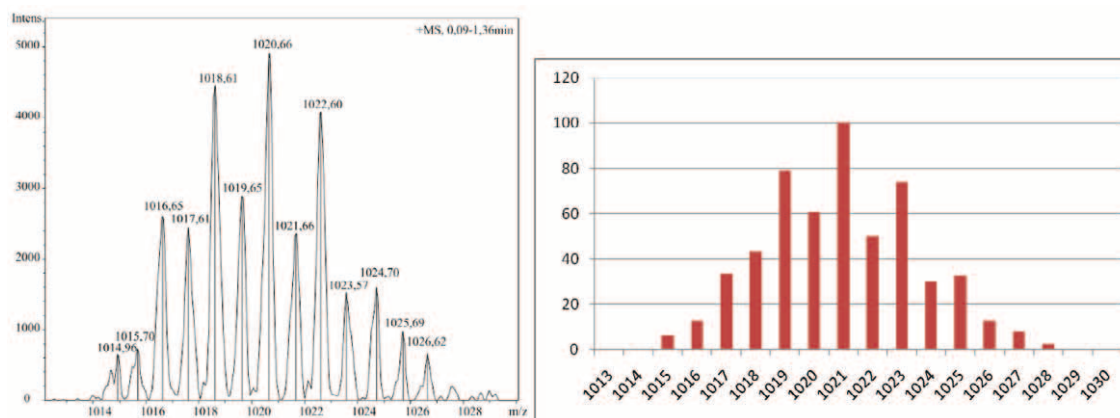

Figure 4 ESI(+) of  $[\text{Pd}(\text{PPh}_3)_3\text{H}_3\text{Br}_3\text{L}]$  **7**.

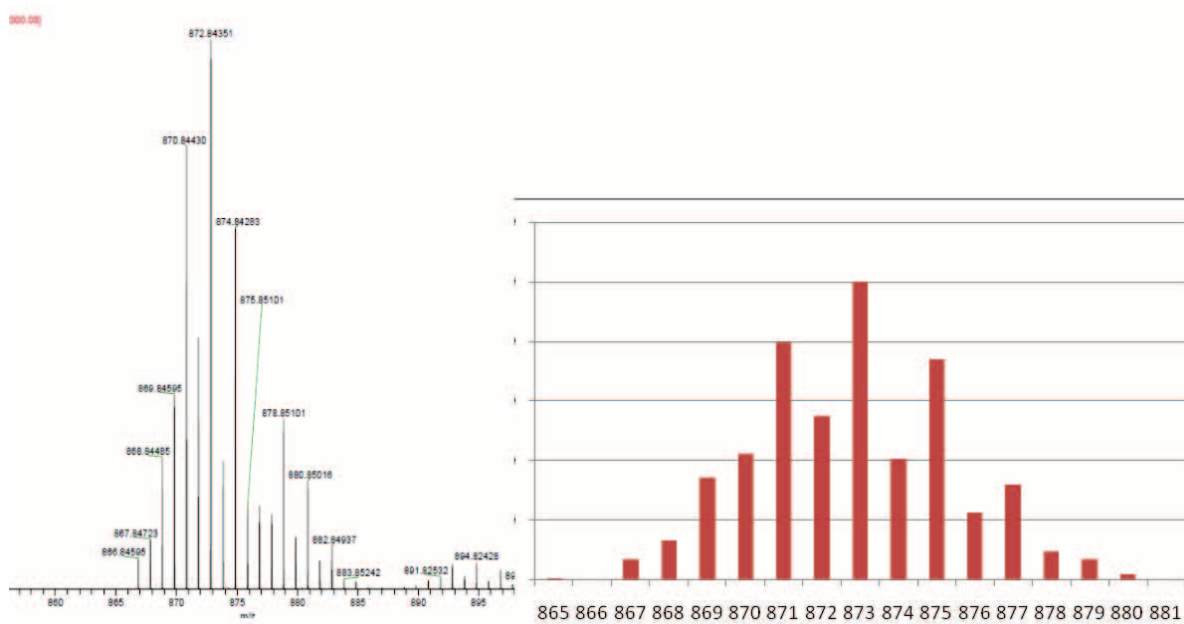

Figure 5 ESI-MS(-) of  $[\text{Pd}(\text{PEt}_3)(\text{H}_2\text{Br}_3\text{L}')]$  **10**.

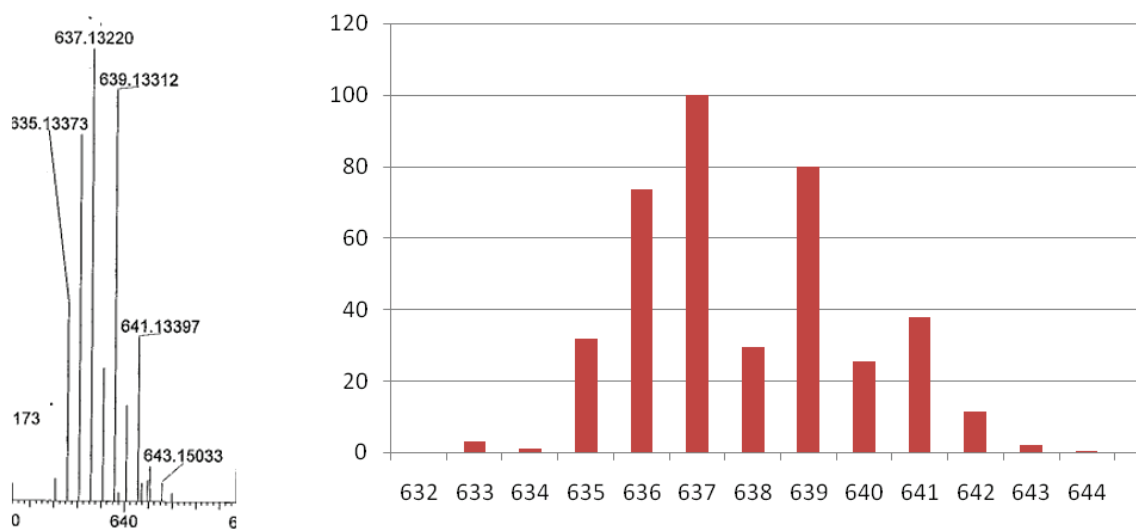

Figure 6 ESI-MS(+) of  $[\text{Pd}(\text{PEt}_3)(\text{H}_2\text{L}')]$  **11**.
